# Supplementary material for: Membrane potential (Vmem) measurements during mesenchymal stem cell (MSC) proliferation and osteogenic differentiation
Source: PeerJ. 2019 Feb 8;7:e6341. doi: 10.7717/peerj.6341 (PMC6369823; doi:10.7717/peerj.6341)
Supplement: Supplemental Information 2 [file peerj-07-6341-s002.xlsx]

## Sheet: Figure 3C data
Day 0
Experimental no ES											Experimental ES
Well 1	Fluorescence						Background				Well 1	Fluorescence						Background
Image 1	Cell	Area	Mean	IntDen	CTCF		Area	Mean	IntDen		Image 1	Cell	Area	Mean	IntDen	CTCF		Area	Mean	IntDen
	1	12876	4836.32	67986819	47398095		334	0.494	165			1	5957	3524.19	20993594	11712588		1456	1152.09	1677447
	2	6835	3895.74	26911280	15982115		242	3.64	881			2	7808	3152.07	24611340	12446476		1720	1907.45	3280809
	3	7079	4106.12	29067192	17747871		204	3.858	787			4	6832	4778.51	32646781	22002525		2366	1735.85	4107011
	4	8624	2847.64	24558032	10768256		227	6.322	1435			5	6832	4778.51	32646781	22002525		1720	1907.45	3280809
	5	9421	2991.15	28179591	13115412		223	5.381	1200			6	7482	3955.68	29596399	17939443		2366	1735.85	4107011
Image 2	1	5990	2206.45	13216663	3638653		536	1640.88	879510		Image 2	1	8449	3359.37	28383280	15219738		1456	1152.09	1677447
	2	10907	6645.14	72478567	55038274		1593	1351.83	2153470			1	8449	3359.37	28383280	15219738		3439	1313.14	4515893
	3	2368	6891.96	161051365	157264933		1588	1274.18	2023404			3	12005	6392.88	76746566	58042776		2341	1414.72	3311868
	4	4854	2589.96	12571674	4810128		1888	1317.61	2487648			4	23168	7798.81	180682792	144587048		1315	1368.88	1800084
	5	10586	6504.67	75363055	58436041		1817	1401.69	2546864			1	10277	6620.06	68034309	52022743		1359	1335.43	1814850
Image 3	1	7326	2131.62	15616237	3901963		3546	3047.92	10807916		Image 3	1	11583	7588.42	87896701	69850387		1371	2584.72	3543651
	2	13640	7213.81	98396407	76586047		1677	3450.5	5786492			2	5957	3524.19	20993594	11712588		1720	1907.45	3280809
	3	18578	9171.14	179552606	149846384		1999	4656.92	9309175			2	17245	5453.06	94037973	67170263		2366	1735.85	4107011
	4	7326	6131.62	15616237	3901963		1483	2648.6	3927875			2	17245	5453.06	94037973	67170263		753	2044.26	1539326
Well 2	5	19578	9171.14	179552606	148247384		1533	2764.1	4237362		Well 2	5	7808	3152.07	24611340	12446476		793	3258.12	2583692
Image 1	2	7326	2132.62	15616237	3901963		1477	1791.66	2646287		Image 1	1	8580	10962.4	94057069	80689429		1143	1650.81	1886875
	3	7226	2151.62	15616237	4061863		1153	1853.89	2137537			1	16398	7801.53	127929570	102381486		461	1567.39	722567
	4	14136	8297.75	117297017	94693553		3023	1205.53	3644307			2	17245	5453.06	94037973	67170263		1720	1907.45	3280809
	5	4339	4055.07	17594925	10656864		2499	1198.47	2994968			4	11354	7152.7	81211712	63522180		2366	1735.85	4107011
	6	14666	5175.71	72660879	49209945		2566	1101.13	2825493			5	17245	5453.06	94037973	67170263		1327	1007.23	1336597
Image 2	1	14066	5165.71	72660879	50169345		4974	2335.4	11616297		Image 2	1	9214	6572.69	60560773	46205361		1720	1907.45	3280809
	2	10281	5374.76	55257892	38818573		2531	2241.23	5672564			2	10206	9317	95089312	79188364		2366	1735.85	4107011
	3	9602	5513.65	50123979	34770381		6382	3346.98	21360431			3	22750	8431.84	191824300	156379800		4060	1616.59	6563334
	4	13345	5065.39	67597629	46258974		3898	1737.34	6772168			2	17245	5453.06	94037973	67170263		1437	1213.81	1744242
	5	9902	5553.65	50123979	34290681		2267	1664.22	3772785			1	8449	3359.37	28383280	15219738		2391	829.933	1984369
Image 3	1	12875	5830.32	67986819	47399694		4149	1613.5	6694402		Image 3	1	17687	5654.94	100018908	72462562		1045	724.792	757408
	2	8274	5196.26	42993848	29763722		1079	1657.01	1787912			2	17687	5654.94	100018908	72462562		2930	1809.38	5301494
	3	9802	5113.65	50123979	34450581		876	1675.64	1467857			3	8684	4572.77	39709943	26180271		1437	1715.42	2465066
	4	15738	5551.64	66830595	41665533		2121	1449.39	3074149			4	8684	4572.77	39709943	26180271		1061	1497.64	1588994
Well 3	5	15316	6047.97	92630630	68140346		920	1574.58	1448610		Well 3	2	36197	5884.86	213014420	156619494		2930	1809.38	5301494
Image 1	1	5786	3756.66	21360383	12108569		703	172.858	121519		Image 1	1	13109	5162.5	67675210	47251388		1004	569.159	571436
	2	12075	4830.32	67986819	48678894		661	600.207	396737			2	9411	6722.47	63265134	48602796		1456	1152.09	1677447
	3	5686	3756.66	21360383	12268469		1323	829.554	1097500			3	8449	3359.37	28383280	15219738		1720	1907.45	3280809
	4	9802	5113.65	50123979	34450581		446	1000.76	446337			4	9176	2089.93	19177221	4881013		2366	1735.85	4107011
	4	7326	2131.62	15616237	3901963		961	884.71	850206		Image 2	5	17827	4838.66	86258856	58484390		1021	862.16	880265
Image 2	1	12066	5165.71	72660879	53367345		4651	1916.47	8913504			1	10048	7388.56	74240289	58585505		915	2112.89	1933293
	2	5048	2291.24	11566187	3494435		2273	1859.69	4227085			2	17827	4838.66	86258856	58484390		1058	2199.11	2326659
	1	7326	2131.62	15616237	3901963		1647	1822.16	3001106			3	8395	7569.62	63546930	50467520		542	0.077	42
	4	13085	4831.32	67986819	47063904		1717	1901.03	3264071			2	36197	5884.86	213014420	156619494		257	17.875	4594
	5	9702	5113.65	50123979	34610481		1081	1721.63	1861078			1	10974	4949.48	54315570	37218078		1720	1907.45	3280809
Image 3	1	9802	5112.65	50123979	34450581		3407	2311.51	7875300		Image 3	2	17827	4838.66	86258856	58484390		2366	1735.85	4107011
	2	11038	5551.64	66830595	49180833		1594	1716.75	2736495			2	36197	5884.86	213014420	156619494		1720	1907.45	3280809
	2	10738	5551.64	66830595	49660533		1971	1933.83	3811585			4	7519	5462.02	41068967	29354365		2366	1735.85	4107011
	4	14075	4630.32	67986819	45480894		1060	1569.85	1664040			5	7519	5462.02	41068967	29354365		4037	1323.6	5343381
	3	9902	5123.65	50123979	34290681		2534	1698.11	4303015			15	17827	4838.66	86258856	58484390		1714	1659.7	2844731
	Total CTCF Mean:				4.04855e+07			1599.09				Total CTCF Mean:				5.70369e+07			1557.97
	Total CTCF STDEV:				3.72768e+07							Total CTCF STDEV:				4.19858e+07
	Total Area measured				456339							Total Area measured				613024
Day 7
no ES											ES
Well 1	Fluorescence						Background				Well 1	Fluorescence						Background
Image 1	Cell	Area	Mean	IntDen	CTCF		Area	0	IntDen		Image 1	Cell	Area	Mean	IntDen	CTCF		Area	Mean	IntDen
	1	8882	2161.42	19503732	16772517		1110	32.633	36223			1	17239	3056.39	52689042	4.71402e+07		863	142.146	122672
	2	7887	5751.15	45359333	4.29341e+07		827	3.337	2760			2	11316	2200.46	24900430	2.1258e+07		543	151.512	82271
	3	9817	835.575	8202844	5.18412e+06		841	1.226	1031			3	7272	3783.09	27510654	2.51699e+07		114	291.088	33184
	4	6794	4481.8	30449367	28360212		2621	98.836	259050			4	16803	2699.19	45354459	3.99459e+07		441	4.492	1981
	5	10874	4356.58	47373471	44029716		841	1.226	1031			5	8085	1795.43	14516043	1.19136e+07		517	136.348	70492
Image 2	1	7136	4235.74	30226275	28031955		865	627.988	543210		Image 2	1	13173	2836.3	37362549	3.31224e+07		1463	242.362	354576
	3	11534	3557.89	41036764	37490059		505	323.768	163503			2	10704	2232.59	23897601	2.04522e+07		414	329.703	136497
	5	12819	3875.66	49682135	4.57403e+07		786	251.917	198007			3	11163	2297.22	25643832	2.20507e+07		446	324.368	144668
	8	17646	4566.53	80580956	75154811		324	374.136	121220			4	11163	2297.22	25643832	2.20507e+07		394	284.728	112183
	10	7887	5751.15	45359333	4.29341e+07		352	469.216	165164			5	14625	1894.93	27713309	23005814		405	288.477	116833
Image 3	1	13769	2211.85	30455020	2.62211e+07		406	0.042	17		Image 3	1	10165	2201.32	22376436	1.91045e+07		585	199.043	116440
	3	11955	3132.2	37445497	3.37693e+07		148	12.635	1870			2	9348	2799.85	26173020	2.31641e+07		336	865.304	290742
	5	8982	2171.42	19503732	16741767		371	79.518	29501			3	4515	2402.25	10846160	9.39287e+06		456	576.011	262661
	8	12744	3004.33	38287180	34368400		371	79.518	29501			4	7556	2081.58	15728444	1.32963e+07		695	387.212	269112
Well 2	10	7916	4195.96	33215220	30781050		274	205.781	56384		Well 2	5	9268	2239.1	20751946	1.77688e+07		410	791.451	324495
Image 1	1	14258	3759.79	53607143	49222808		530	251.9	133507		Image 1	1	9118	1410.52	12861094	9.92619e+06		795	181.206	144059
	2	8682	2161.42	19503732	16834017		530	164.73	87307			2	7592	2122.55	16114422	1.36707e+07		677	3.164	2142
	3	14288	5887.77	84124515	79730955		436	127.486	55584			3	8144	3665.48	29851668	2.72303e+07		394	128.754	50729
	4	9326	3800.54	35443848	32576103		254	616.528	156598			4	18034	1755.69	31662211	2.58574e+07		619	309.094	191329
	1	18778	3743.55	70296430	64522195		353	634.193	223870			5	3915	2576.47	10086888	8.82673e+06		452	274.814	124216
Image 2	1	18229	3798.45	69241868	6.36365e+07		610	446.716	272497		Image 2	1	11607	2390.18	27742785	2.40067e+07		515	302.421	155747
	2	10385	4617.72	47954971	4.47616e+07		429	422.497	181251			2	24746	4060.53	100481767	9.25165e+07		398	369.734	147154
	3	9134	3089.05	28215415	25406710		411	628.367	258259			3	13634	3141.05	42825120	3.84366e+07		339	130.286	44167
	4	6229	2988.75	18616950	1.67015e+07		294	803.497	236228			4	12234	2134.99	26119451	2.21816e+07		281	57.698	16213
	5	12742	3076.25	39197529	35279364		523	328.138	171616			5	12403	3092.3	38353859	3.43616e+07		427	229.035	97798
Image 3	1	19074	3560.22	67907733	62042478		1060	68.846	72977		Image 3	1	10772	3641.09	39221853	3.57546e+07		455	499.826	227421
	2	18330	3088.44	56611066	50974591		702	309.823	217496			2	12207	2692.36	32865658	2.89365e+07		321	283.642	91049
	3	6794	4481.8	30449367	28360212		538	153.264	82456			3	11269	3389.36	38194703	3.45674e+07		326	229.077	74679
	4	10874	4356.58	47373471	44029716		573	99.475	56999			4	11908	2545.82	30315565	2.64826e+07		321	283.642	91049
Well 3	5	15688	4754.39	74586877	69762817		368	425.12	156444		Well 3	5	10592	2352.59	24918683	2.15093e+07		326	229.077	74679
Image 1	1	13036	4167.47	54327140	50318570		663	181.388	120260		Image 1	1	9595	3226.78	30960990	2.78726e+07		580	484.821	281196
	2	9234	3079.05	28215415	25375960		619	464.052	287248			2	17284	2431.84	42031890	3.64685e+07		487	155.723	75837
	3	6794	4481.8	30449367	28360212		462	428.292	197871			3	8844	1665.92	14733440	1.18867e+07		704	359.246	252909
	4	10874	4356.58	47373471	44029716		554	358.081	198377			4	6825	2590.27	17678604	15481773		684	352.551	241145
	5	11358	3329.52	37483750	33991165		448	496.478	222422		Image 2	5	15240	2177.3	33182091	2.82766e+07		452	304.869	137801
Image 2	1	12358	3343	37483750	33683665		457	561.656	256677			1	8593	2264.07	19455194	1.66893e+07		393	590.911	232228
	2	22706	4298.34	97598150	90616055		632	991	626312			2	6021	1491.4	8979734	7.04169e+06		499	115.659	57714
	3	6750	4334.54	37927188	35851563		575	427.414	245763			3	5504	2023.7	11138465	9.36684e+06		701	353.088	247515
	4	5499	2868.36	15773092	1.40821e+07		684	145.588	99582			4	12115	3740.31	45313887	4.14143e+07		740	240.088	177665
	5	9529	2614.02	24908978	2.19788e+07		533	369.135	196749			5	5290	2254.96	11928760	1.0226e+07		386	268.541	103657
Image 3	1	11258	3329.52	37483750	34021915		837	362.08	303061		Image 3	1	23796	3651.45	86889799	7.92303e+07		716	267.962	191861
	2	10240	4204.23	43051352	39902552		217	247.714	53754			2	12084	3195.23	38611197	3.47216e+07		739	708.434	523533
	3	10927	2355.22	25735477	2.23754e+07		159	559.377	88941			3	18110	3193.71	57838116	5.20089e+07		955	678.299	647776
	4	8750	4334.54	37927188	35236563		465	103.927	48326			4	29737	2900.43	86250091	7.66783e+07		379	643.438	243863
	5	10649	3898.66	41516793	3.82422e+07		3767	101.095	380823			5	15149	2252.21	34118780	2.92426e+07		1173	435.309	510618
	Total CTCF Mean: Total CTCF Mean:				3.8676e+07			307.547				Total CTCF Mean:				2.82157e+07			321.881
	Total CTCF STDEV:				1.81548e+07							Total CTCF STDEV:				1.82771e+07
	Total Area measured				509415							Total Area measured				534757
Day 14
no ES											ES
Well 1	Fluorescence						Background				Well 1	Fluorescence						Background
Image 1	Cell	Area	Mean	IntDen	CTCF		Area	Mean	IntDen		Image 1	Cell	Area	Mean	IntDen	CTCF		Area	Mean	IntDen
	1	12145	4453.95	54093178	49429498		583	332.928	194097			1	11942	1100.57	13143034	9345478		318	0.365	116
	2	6772	2969.66	20495302	17894854		368	329.005	121074			2	6163	1342.97	8276751	6316917		404	272.911	110256
	3	15803	3681.97	58186114	52117762		552	661.321	365049			3	12273	1216.09	14925062	11022248		493	351.087	173086
	4	14279	3236.6	46215452	40732316		325	51.742	16816			4	6675	920.21	6142401	4019751		686	131.259	90044
	5	5623	4901.18	27559332	25400100		683	242.928	165920			5	12857	1255.18	16137802	12049276		419	206.103	86357
Image 2	1	9360	3362.31	31471238	27876998		590	989.429	583763		Image 2	1	6110	1049.12	6410117	4467137		185	386.319	71469
	2	8620	6431.15	55436486	52126406		597	448.958	268028			2	6868	685.775	4709900	2525876		196	83.138	16295
	3	10485	2622.7	27499036	23472796		685	168.578	115476			3	7179	1366.27	9808423	7525501		275	334.807	92072
	4	7279	8245.49	60018935	57223799		1009	371.735	375081			4	5680	832.211	4726960	2920720		305	81.869	24970
	5	7409	3064.97	22708381	19863325		467	950.925	444082			5	8637	765.594	6612434	3865868		196	17.464	3423
Image 3	1	11959	6404.14	76587105	71994849		487	16.092	7837		Image 3	1	9797	1532.39	15012798	11897352		271	461.255	125000
	2	10988	5645.74	62035394	57816002		1106	79.931	88404			2	16497	2179.11	35948799	30702753		359	331.142	118880
	6	9392	6877.15	64590224	60983696		695	270.665	188112			3	7057	1625.08	11468181	9224055		371	64.951	24097
	7	8821	6123.64	60228634	56841370		834	374.688	312490			4	7148	1796.25	12839617	10566553		444	449.791	199707
Well 2	8	5097	7303.56	37226255	35269007		512	87.176	44634		Well 2	5	9269	2248.04	20837097	17889555		271	133.376	36145
Image 1	1	16131	5142.52	82953989	76759685		801	1300.8	1041939		Image 1	1	9458	2017.89	19085197	16077553		525	595.962	312880
	2	11419	2809.44	34865640	30480744		366	260.637	95393			2	7183	1908.01	13705207	11421013		354	756.184	267689
	3	11467	3302.23	37866670	33463342		574	542.378	311325			3	6737	1622.32	10929585	8787219		268	1189.23	318713
	4	6972	2939.66	20495302	17818054		349	1006.23	351174			4	8209	1836.25	15073767	12463305		96	191.292	18364
	5	7175	4741.31	34018902	31263702		398	789.678	314292			5	12409	1900.66	23585278	19639216		292	665.774	194406
Image 2	1	9268	3866.9	35838403	32279491		1614	436.597	704667		Image 2	1	6257	1276.62	7987842	5998116		560	415.13	232473
	2	7958	4764.77	37918070	34862198		559	87.828	49096			2	6481	1348.94	8742483	6681525		854	238.938	204053
	3	9650	4142.16	39971831	36266231		591	1014.55	599601			3	8036	1776.99	14279871	11724423		738	29.443	21729
	4	10838	3487.03	37792404	33630612		415	1617.45	671243			4	10561	1726.6	18234660	14876262		372	174.392	64874
	5	12419	2807.44	34865640	30096744		247	186.162	45982			5	6771	2180.33	14763002	12609824		359	155.699	55896
Image 3	1	7575	4616.96	34003911	31095111		1293	138.181	178668		Image 3	1	7723	2513.43	19411201	16955287		240	396.717	95212
	2	10226	2762.2	28246203	24319419		1031	349.055	359876			2	10084	2656.85	26791720	23585008		436	500.525	218229
	3	12306	2710.33	33353285	28627781		1153	295.084	340232			3	6802	1938.27	13184119	11021083		355	234.394	83210
	4	7029	5451.01	38315172	35616036		538	278.526	149847			4	6315	1413.84	8928401	6920231		276	468.17	129215
Well 3	5	7511	5169.36	38827100	35942876		892	487.776	435096		Well 3	5	5664	2987.87	16923316	15122164		116	669.672	77682
Image 1	1	7698	4326.96	34003911	31047879		576	156.03	89873		Image 1	1	9606	1650.36	15853379	12798671		181	261.221	47281
	2	10893	1508.46	15506009	11323097		1601	343.854	550511			2	6669	2326.65	15516423	13395681		335	142.746	47820
	3	8292	2337.89	19367818	16183690		814	196.736	160143			3	6551	1193.66	7819651	5736433		353	276.32	97541
	4	7875	4317.96	34003911	30979911		1047	133.057	139311			4	9732	2055.61	20005221	16910445		282	30.113	8492
	5	8977	3539.4	31773216	28326048		704	194.068	136624		Image 2	5	8517	1299.23	11065509	8357103		202	219.673	44374
Image 2	6	7062	3614.43	25525102	22813294		1871	161.836	302795			1	6902	1315.34	9078464	6883628		446	179.742	80165
	2	8392	2307.89	19367818	16145290		2025	222.984	451542			2	10157	2015.74	20473878	17243952		304	474.273	144179
	3	13578	4931.6	66961278	61747326		1694	710.482	1203556			3	8624	973.044	8391534	5649102		353	432.618	152714
	4	7875	4317.96	34003911	30979911		1105	226.532	250318			4	9432	1869.55	17633627	14634251		340	30.874	10497
	5	10293	1506.46	15506009	11553497		504	57.089	28773			5	8316	1735.21	14430014	11785526		168	724.435	121705
Image 3	1	11026	2940.52	32422189	28188205		1184	152.465	180518		Image 3	1	12327	1286.11	15853833	11933847		253	107.644	27234
	2	15561	2920.33	45443299	39467875		1624	269.836	438213			2	7087	1009.78	7156314	4902648		370	49.078	18159
	3	9306	2608.34	24273173	20699669		1192	204.316	243545			3	6033	1611.49	9722128	7803634		377	567.87	214087
	4	8091	2099.89	16990233	13883289		812	69.956	56804			4	11953	1870.33	22356104	18555050		328	462.137	151581
	5	7675	4316.96	34003911	31056711		636	12.318	7834			5	11727	1366.48	16024723	12295537		305	368.849	112499
	Total CTCF Mean:				3.45769e+07			383.969				Total CTCF Mean:				1.1269e+07			318.11
	Total CTCF STDEV:				1.57702e+07							Total CTCF STDEV:				5.71027e+06
	Total Area measured				434570							Total Area measured				386475
Day 21
no ES											ES
Well 1	Fluorescence						Background				Well 1	Fluorescence						Background
Image 1	Cell	Area	Mean	IntDen	CTCF		Area	Mean	IntDen		Image 1	Cell	Area	Mean	IntDen	CTCF		Area	Mean	IntDen
	1	10934	5849.89	63962650	54122050		1535	950.147	1458476			1	9257	2205.14	20401527	17828081		2281	605.516	1381182
	2	14438	4799.55	69295934	56301734		1215	224.32	272549			2	6226	1433.03	8855494	7124666		2281	180.726	412236
	3	12633	3800.37	48010130	36640430		1103	893.575	985613			3	5697	2208.83	12583683	10999917		2281	273.264	623316
	4	22197	5795.45	128641504	108664204		774	909.041	703598			4	6033	1611.49	9722128	8044954		2281	197.034	449435
	5	16953	4400.45	74600872	59343172		1346	41.027	55222			5	9578	2402.77	23013748	20351064		2381	605	1381182
Image 2	1	4664	4625.37	18573063	14375463		917	544.329	499150		Image 2	11	8799	2630.62	23146844	20700722		3004	256.529	770612
	2	15127	3611.77	54635178	41020878		646	1119.8	723388			12	9256	2204.14	20401527	17828359		3004	162.733	488851
	1	4614	4025.37	18573063	14420463		703	847.323	595668			13	5863	1905.67	11172920	9543006		3004	403.328	1211597
	2	5476	2049.98	11225701	6297301		524	1661.58	870668			14	6223	1423.03	8855494	7125500		2815	353.923	999109
	3	6266	1131.79	7091824	1452424		581	441.583	256560			15	10498	2057.1	21595447	18677003		3004	107.077	321658
Image 3	4	4614	4325.37	18573063	14420463		872	1076.51	938716		Image 3	21	6224	1473.03	8855494	7125222		2815	129.034	363232
	5	4276	1785.63	7635375	3786975		1776	392.675	697391			22	4762	2036.79	9699172	8375336		2815	96.807	272511
	3	12898	6122.55	78968675	67360475		1350	973.619	1314385			23	15845	1512.07	23958774	19553864		2815	56.194	158185
	4	11448	4479.7	51283617	40980417		1099	798.576	877635			24	13722	2393.16	32838940	29024224		2815	354.923	999109
Well 2	5	12870	5747.26	73967189	62384189		994	752.455	747940		Well 2	25	15835	1512	23958774	19556644		2815	300.041	844616
Image 1	1	11548	4579.7	51283617	40890417		1410	1634.77	2305024		Image 1	1	13991	3283.25	45935942	42046444		2131	127.054	270752
	2	21034	3022.28	63570588	44639988		873	1606.36	1402352			2	13807	2686.3	37089725	33251379		2131	308.626	657682
	6	8710	1933.9	16844251	9005251		873	1749.3	1527138			3	15434	1688.16	26055003	21764351		2131	72.298	154068
	7	4192	2045.97	8576711	4803911		873	1080.19	943006			4	12082	2629.13	31765099	28406303		2131	233.91	498463
	8	5258	1982.09	10421803	5689603		873	652.279	569440			5	3627	1454.45	5275288	4266982		2131	72.298	154068
Image 2	9	6588	1335.45	8797977	2868777		1286	1412.41	1816356		Image 2	12	13007	2795.33	36358896	32742950		2680	498.174	1335105
	2	4192	2545.97	8576711	4803911		1286	808.213	1039362			13	9746	2324.49	22654461	19945073		2680	237.066	635336
	3	12870	5750.26	73967189	62384189		1286	677.151	870816			14	7927	1649.58	13076183	10872477		2680	58.179	155919
	4	6997	2889.54	20218082	13920782		1286	456.891	587562			15	7183	2105.7	15125225	13128351		2680	214.721	575452
	5	6997	2821.11	19739330	13442030		1286	1916.93	2465167			16	8197	2439.94	20000155	17721389		2680	104.705	280609
Image 3	1	10170	1736.88	17552194	8399194		784	1357.57	1064332		Image 3	22	3677	1654.45	5275288	4253082		976	388.51	379186
	2	12105	3800	45402285	34507785		784	1354.78	1062151			23	11395	2783.39	31716679	28548869		976	551.501	538265
	3	12105	3869	45402285	34507785		784	1265.42	992086			24	11391	1345	15325795	12159097		976	651.804	636161
	1	5655	2315.47	13093974	8004474		784	943.791	739932			25	11389	1345.54	15325795	12159653		976	241.678	235878
Well 3	2	10170	1725.88	17552194	8399194		784	666.117	522236		Well 3	26	8187	2966.38	24285782	22009796		976	255.224	249099
Image 1	3	6524	1571.26	10250866	4379266		738	1085.81	801325		Image 1	1	6888	1947.27	13412811	11497947		1058	227.934	241154
	4	6797	2989.54	20218082	14100782		738	845.874	624255			2	14855	1850.1	27483195	23353505		1058	344.793	364791
	5	3249	1873.06	6085579	3161479		738	1188.41	877045			3	12637	2621.2	33124079	29610993		1058	279.935	296171
	4	14036	5046.6	70834129	58201729		738	671.95	495899			4	14845	1950.1	27483195	23356285		1058	797.361	843608
	5	12508	3509.04	43891038	32633838		738	1273.9	940135		Image 2	5	17567	2428.41	42659909	37776283		1058	195.766	207120
Image 2	2	12105	3850.7	45402285	34507785		1947	961.417	1871879			11	10987	2246.55	24682850	21628464		3921	128.358	503292
	3	13105	3900	45402285	33607785		1947	724.993	1411562			12	14280	1896.57	27083029	23113189		3921	238.329	934489
	4	14105	4900	45402285	32707785		1947	281.467	548016			13	17112	1593.39	24079323	19322187		3921	206.117	808183
	5	14036	5047	70834129	58201729		1947	424.46	826424			14	11390	1345.55	15325795	12159375		3931	239	934489
	5	12105	3750.7	45402285	34507785		1947	202.176	393637			15	13368	1920.97	25679547	21963243		3921	133.762	524481
Image 3	1	13105	3870	45402285	33607785		3287	1093.24	3593488		Image 3	1	17988	2014.67	32210565	27209901		3821	206	808183
	2	13825	3189.15	44090051	31647551		3287	455.855	1498395			2	11398	1245	15325795	12157151		1048	190.766	374555
	3	31768	3406.85	108228876	79637676		3287	723.81	2379164			3	14178	2053.68	29117117	25175633		850	485.901	413016
	4	11761	3261.26	38355711	27770811		3287	541.137	1778718			4	17496	2608.55	29987913	25124025		850	590.516	501939
	5	12580	2090	26292246	14970246		3287	853.017	2803866			5	16508	1926.29	31799252	27210028		850	183.242	155756
	Total CTCF Mean:				3.04774e+07			900.805				Total CTCF Mean:				1.92398e+07			278.792
	Total CTCF STDEV:				2.44228e+07							Total CTCF STDEV:				8.99777e+06
	Total Area measured				489608							Total Area measured				496355

## Sheet: Figure 3C Plot
	t-Test: Two-Sample Assuming Unequal Variances						t-Test: Two-Sample Assuming Unequal Variances						t-Test: Two-Sample Assuming Unequal Variances
		day 21	day 21					day 14nes	day 14 es					day 7enes	day7ees
	Mean	3.04774e+07	1.92398e+07				Mean	3.45769e+07	1.1269e+07				Mean	3.8676e+07	2.82157e+07
	Variance	5.96473e+14	8.09599e+13				Variance	2.487e+14	3.26072e+13				Variance	3.29598e+14	3.34053e+14
	Observations	45	45				Observations	45	45				Observations	45	45
	Hypothesized Mean Difference	0					Hypothesized Mean Difference	0					Hypothesized Mean Difference	0
	df	56					df	55					df	88
	t Stat	2.8963					t Stat	9.3222					t Stat	2.72384
	P(T<=t) one-tail	0.0026885					P(T<=t) one-tail	3.24116e-13					P(T<=t) one-tail	0.00389095
	t Critical one-tail	1.67252					t Critical one-tail	1.67303					t Critical one-tail	1.66235
	P(T<=t) two-tail	0.00537699					P(T<=t) two-tail	6.48233e-13					P(T<=t) two-tail	0.0077819
	t Critical two-tail	2.00324					t Critical two-tail	2.00404					t Critical two-tail	1.98729

## Sheet: Fig.3 D E F Data&Plot
						ES	AREA	Mean	SD	Vmem	SD
				Day 21	1	day21_experim.ES_well3_10x_9.tif:Red	177940	169753	8887.28	19239844	8.99777e+06
					2	day21_experim.ES_well3_10x_7.tif:Red	171018
					3	day21_experim.ES_well3_10x_10.tif:Red	160301
				Day 14	4	day14_exp.ES_well1_10x_4.tif:Red	105489	101073	8523.49	1.1269e+07	5.71027e+06
					5	day14_exp.ES_well1_10x_2.tif:Red	91248
					6	day14_exp.ES_well2_10x_7.tif:Red	106483
				Day 7	7	day7_EXP_ES_Alizarin_10x_WELL3_6.tif:Red	13539	14918	7122.34	2.82157e+07	1.82771e+07
					8	day7_EXP_ES_Alizarin_10x_WELL3_3.tif:Red	8586
					9	day7_EXP_ES_Alizarin_10x_WELL3_1.tif:Red	22629
						No ES	Area	Mean	SD	Vmem	SD
				Day 21	1	day21_experim.No.ES_well1_10x_2.tif:Red	31004	22744.7	7152.86	1.92398e+07	2.44228e+07
					2	day21_experim.No.ES_well1_10x_3.tif:Red	18647
					3	day21_experim.No.ES_well1_10x_4.tif:Red	18583
				Day 14	4	day14_exp.NoES_well3_10x_2.tif:Red	15936	18646.7	4304.47	3.45769e+07	1.57702e+07
					5	day14_exp.NoES_well3_10x_3.tif:Red	16394
					6	day14_exp.NoES_well3_10x_4.tif:Red	23610
				Day 7	7	day7_EXP_NOES_Alizarin_10x_WELL1_3.tif:Red	15347	17869.3	4948.7	3.8676e+07	1.81548e+07
					8	day7_EXP_NOES_Alizarin_10x_WELL1_5.tif:Red	23571
					9	day7_EXP_NOES_Alizarin_10x_WELL1_1.tif:Red	14690
				Student T-test	ES vs No ES
				Day 21
				t-Test: Two-Sample Assuming Unequal Variances
					Variable 1	Variable 2
				Mean	169753	22744.7
				Variance	78983749	5.11635e+07
				Observations	3	3
				Hypothesized Mean Difference	0
				df	4
				t Stat	22.3195
				P(T<=t) one-tail	1.19286e-05
				t Critical one-tail	2.13185
				P(T<=t) two-tail	2.38573e-05
				t Critical two-tail	2.77645
				Day 14
				t-Test: Two-Sample Assuming Unequal Variances
					Variable 1	Variable 2
				Mean	101073	18646.7
				Variance	7.26499e+07	1.85284e+07
				Observations	3	3
				Hypothesized Mean Difference	0
				df	3
				t Stat	14.9514
				P(T<=t) one-tail	0.000324671
				t Critical one-tail	2.35336
				P(T<=t) two-tail	0.000649341
				t Critical two-tail	3.18245
				Day 21
				t-Test: Two-Sample Assuming Unequal Variances
					Variable 1	Variable 2
				Mean	14918	17869.3
			Day 7	Variance	50727693	2.44897e+07
			Day 14	Observations	3	3
			Day 21	Hypothesized Mean Difference	0
				df	4
				t Stat	-0.589413
				P(T<=t) one-tail	0.293633
				t Critical one-tail	2.13185
				P(T<=t) two-tail	0.587266
				t Critical two-tail	2.77645
